# Supplementary material for: Trans-oligomerization of duplicated aminoacyl-tRNA synthetases maintains genetic code fidelity under stress
Source: PubMed Central journal article supplement (PMC4787780; doi:10.1093/nar/gkv1020), 2015-10-12
Supplement: supp_gkv1020_nar-02261-z-2015-File011.pdf [file supp_gkv1020_nar-02261-z-2015-File011.pdf]

**Table S1. Plasmids used in this work**

| <b>Name</b> | <b>Description</b>                                                                                                                                                                                                               | <b>Source</b>                                                                                             |
|-------------|----------------------------------------------------------------------------------------------------------------------------------------------------------------------------------------------------------------------------------|-----------------------------------------------------------------------------------------------------------|
| pTrc99a     | <i>lac</i> -promoter-based expression plasmid                                                                                                                                                                                    | <a href="http://www.addgene.org/vector-database/4402/#">http://www.addgene.org/vector-database/4402/#</a> |
| pCMN8       | Derivative plasmid of pRL278 (Elhai & Wolk, 1988) carrying the <i>thrS2</i> gene interrupted by the insertion at the HindIII site of the C.S3 cassette conferring resistance to streptomycin and spectinomycin                   | This work                                                                                                 |
| pCMN10      | Derivative plasmid of pRL278 (Elhai & Wolk, 1988) carrying the <i>thrS1</i> gene interrupted by the insertion at the EcoRI site of the C.S3 cassette conferring resistance to streptomycin and spectinomycin                     | This work                                                                                                 |
| pCMN15      | pTrc99A bearing a NcoI/XhoI fragment containing the <i>thrS1</i> gene( <i>alr0335</i> ) from <i>Anabaena</i> with a 5' His-tag                                                                                                   | This work                                                                                                 |
| pCMN16      | pTrc99A bearing a NcoI/XhoI fragment containing the <i>thrS2</i> gene( <i>all4723</i> ) from <i>Anabaena</i> with a 5' His-tag                                                                                                   | This work                                                                                                 |
| pCMN17      | pTrc99A bearing a EcoRI/Sall fragment containing the <i>thrS</i> gene from <i>E. coli</i> .                                                                                                                                      | This work                                                                                                 |
| pCMN18      | Plasmid based on pCMN15 bearing the <i>trnT</i> (CGU) gene from <i>Anabaena</i> downstream <i>thrS1</i>                                                                                                                          | This work                                                                                                 |
| pCMN19      | Plasmid based on pCMN16 bearing the <i>trnT</i> (CGU) gene from <i>Anabaena</i> downstream <i>thrS2</i>                                                                                                                          | This work                                                                                                 |
| pCMN28b     | Overexpression plasmid based on the comercial vector pET28b (InvitroGen) where the HisTag coding sequence has been substituted by a Strep-Tag II coding sequence using primers Strep-Tag1F and 1R                                | Napolitano et al. (2012)                                                                                  |
| pCMN20      | Plasmid yielding a NdeI/XhoI fragment bearing gene <i>thrS2</i> ( <i>all4723</i> ) from <i>Anabaena</i> PCC 7120 cloned into pCMN28b.                                                                                            | This work                                                                                                 |
| pCMN21      | Plasmid yielding a NdeI/XhoI fragment bearing gene <i>thrS1</i> ( <i>alr0335</i> ) from <i>Anabaena</i> PCC 7120 cloned into pCMN28b.                                                                                            | This work                                                                                                 |
| pCMN30      | Plasmid derived of pET28b bearing the ORFs of <i>thrS2</i> and <i>thrS1</i> fused to sequences encoding a His tag and a StrepTag-II, respectively                                                                                | This work                                                                                                 |
| pCMN31      | Plasmid derived of the pRL278 conjugative vector of <i>Anabaena</i> containing an insert encompassing the 3'-end of the <i>all4724</i> gene and a sequence encoding a StrepTag-II sequence fused to the 5' end of <i>thrS2</i> . | This work                                                                                                 |
| pCMN50      | Plasmid yielding a NdeI/XhoI fragment bearing gene <i>trnT</i> (CGU) from <i>Anabaena</i> PCC 7120 cloned into pCMN28b.                                                                                                          | This work                                                                                                 |
| pCi20       | Plasmid derived of pET28b bearing the ORFs of <i>thrS2</i> and <i>thrS1</i> -SYY fused to sequences encoding a His tag and a StrepTag-II, respectively                                                                           | This work                                                                                                 |
| pCMA49      | Plasmid derived from pCMN21 overexpressing T1-S                                                                                                                                                                                  | This work                                                                                                 |
| pCMA53      | Plasmid derived from pCMN21 overexpressing T1-SY                                                                                                                                                                                 | This work                                                                                                 |
| pCMA54      | Plasmid derived from pCMN21 overexpressing T1-SYY                                                                                                                                                                                | This work                                                                                                 |
| pCMA47      | Plasmid derived from pCMN21 overexpressing T1 $\Delta$ <i>b</i>                                                                                                                                                                  | This work                                                                                                 |
| pCMA48      | Plasmid derived from pCMN21 overexpressing T1 $\Delta$ <i>c</i>                                                                                                                                                                  | This work                                                                                                 |
| pCMA60      | Plasmid derived from pCMN21 overexpressing T1 $\Delta$ <i>bc</i>                                                                                                                                                                 | This work                                                                                                 |
| pCMA68      | Plasmid derived from pCMN20 overexpressing T2 $\Delta$ N                                                                                                                                                                         | This work                                                                                                 |
| pCMA67      | Plasmid derived from pCMN20 overexpressing T2 $\Delta$ a                                                                                                                                                                         | This work                                                                                                 |

**Table S2. Oligonucleotides used in this work**

| Name               | Sequence (5'-3')                                                   | Purpose                                                                                                                                            |
|--------------------|--------------------------------------------------------------------|----------------------------------------------------------------------------------------------------------------------------------------------------|
| E.coli-ThrS-F      | GCAAATAAGAATTCAAAATGCCTG                                           | Amplification of the <i>thrS</i> gene from <i>E. coli</i> . Also adds EcoRI/SalI restriction sites for cloning into the pTrc99a vector             |
| E.coli-ThrS-R      | GACCTGTCGACCGAACTTCCTGGG                                           |                                                                                                                                                    |
| A7120 -CGU-1F      | G TTCAGGATCCAAACGCTTTTGG                                           | Amplification of the <i>trnT</i> gene from <i>Anabaena</i> and introduction of BamHI/HindIII restriction sites for cloning into the pCMN28b vector |
| A7120 -CGU-1R      | CTTTAGATAAGCTTTATAAATAGCCTCT                                       |                                                                                                                                                    |
| A7120 -CGU-2F      | CGGCTCCATTTTCATAAAATCATAT                                          |                                                                                                                                                    |
| A7120- CGU-2R      | GAAAATGGAGCCGATGATGGGATTTG                                         | Partially overlapping primers designed to add a CCA sequence at the 3' end of the <i>trnT</i> gene encoding tRNA <sup>Thr</sup> (CGU)              |
| Strep-Tag 1F       | CATGGCAAGCTGGAGCCACCCGCAGTTCGAAAAGGGTGCCTTGAAGTCCTCTTTTCAGGGACCCCA | Overlapping primers that carry the sequence of the Strep-TagII plus NcoI/NdeI restriction sites to replace the HisTag portion of the pET28b.       |
| Strep-Tag 1R       | TATGGGGTCCCTGAAAGAGGACTTCAAGTGCACCCCTTTTCGAACTGCGGGTGCTCCAGCTTGC   |                                                                                                                                                    |
| A7120-THRS1-2F     | CACTTTGTTACGCAGCACCT                                               | Q-PCR                                                                                                                                              |
| A7120-THRS1-2R     | TTTGCCAGTGTCTGAAGTC                                                | Q-PCR                                                                                                                                              |
| A7120-THRS2-2F     | AAGCCAACCTGCCAATAATC                                               | Q-PCR                                                                                                                                              |
| A7120-THRS2-3R     | AAGTAGCGGGTGATGGTTTC                                               | Q-PCR                                                                                                                                              |
| A7120-RNPB-1F      | TTGGTAACAAACGTCCCAGA                                               | Q-PCR                                                                                                                                              |
| A7120-RNPB-1R      | TAAGCCGGGTCTGTCTCT                                                 | Q-PCR                                                                                                                                              |
| 7120TRNAGLU-1F     | GGCGATTGGATATTTCTTAG                                               | Used to generate a probe to detect tRNA <sup>Glu</sup> by Northern                                                                                 |
| 7120TRNAGLU-1R     | CCTGAAGGGATTTAAGTTAGTAT                                            |                                                                                                                                                    |
| RS1 ser FW         | CAATGAATAGCCCCTTCCAC                                               | Mutation of Cys308 of T1 to Ser                                                                                                                    |
| RS1 ser RV         | GTGGAAGGGGCTATTCATTG                                               |                                                                                                                                                    |
| A7120-Thrs1-3F     | ATGATTCTTACTTATTCGTGACCCCA                                         | Mutation of His359 of T1 to Tyr                                                                                                                    |
| A7120-Thrs1-3R     | CACGAATAAGTAAGAATCATCAACAG                                         |                                                                                                                                                    |
| A7120-Thrs1-4F     | TGATGATTTACCGTGCGCCTTTC                                            | Mutation of His488 of T1 to Tyr                                                                                                                    |
| A7120-Thrs1-4R     | CGCACGGTAAATCATCACGGGAC                                            |                                                                                                                                                    |
| thrRS1_indel2_FW   | CAAGGCTTTGTCTCTCAAGC                                               | Divergent primers for amplification of the complete sequence of pCMN21 but the portion comprising indel <i>b</i>                                   |
| thrRS1_indel2_RV   | TTCATCCTCAGCCATCAGG                                                |                                                                                                                                                    |
| thrRS1_indel3_FW   | AAGTACATCGGTTCTGATGAAG                                             | Divergent primers for amplification of the complete sequence of pCMN21 but the portion comprising indel <i>c</i>                                   |
| thrRS1_indel3_RV   | TGGGTCACGGAACCTGAGT                                                |                                                                                                                                                    |
| RS2_deltaindel1_FW | AACTATTGGTGGGACTTGTGC                                              | Divergent primers for amplification of the complete sequence of pCMN20 but the portion comprising indel <i>a</i>                                   |
| RS2_deltaindel1_RV | ACCAATAAAGTAGCGGGTGAT                                              |                                                                                                                                                    |
| RS2_domN2_FW       | CACAGCTCATATGACAAAGGCAG                                            | Divergent primers for amplification of the complete sequence of pCMN20 but the portion comprising the N1-N2 domain                                 |
| RS2_domN2_RV       | GGAAGTACCATATGAATAAAT                                              |                                                                                                                                                    |

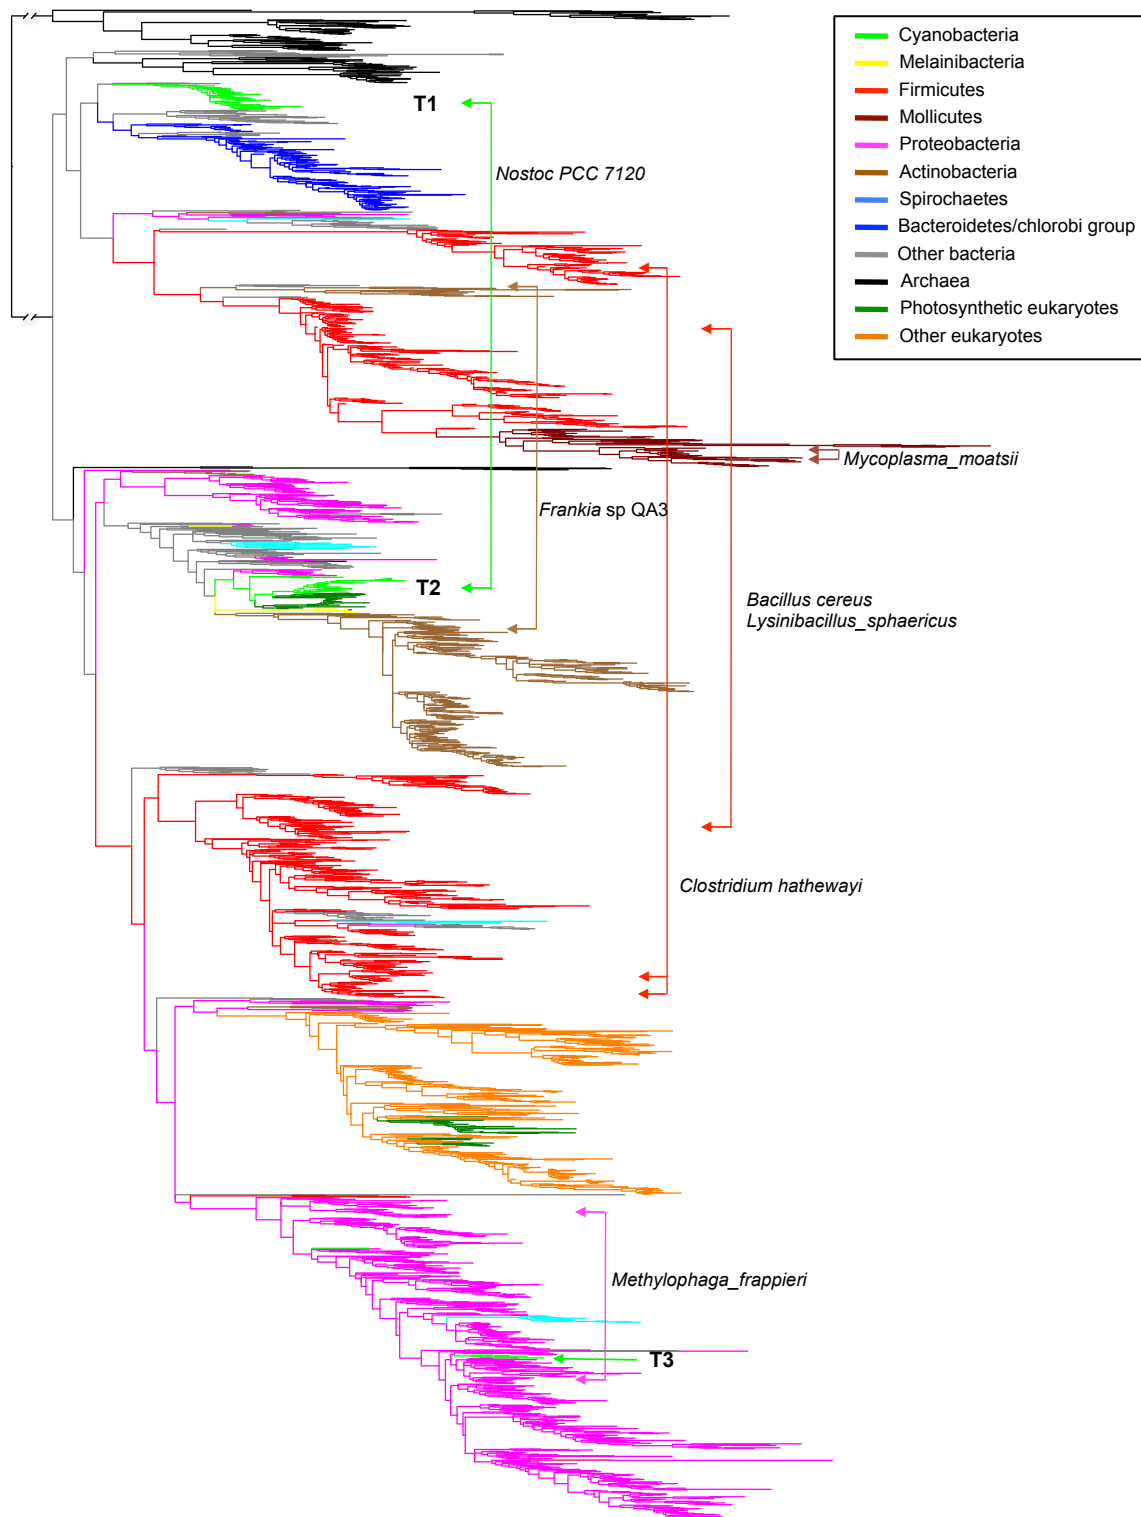

**Figure S1.** Phylogeny of ThrRSs. Branches are coloured according to the code indicated in the box. Connected arrows mark the two ThrRS copies of some representative organisms following the same colour code as branches. Distant connected arrows (as in *Bacillus cereus*) indicate that ThrRSs originated from ancient gene duplication or lateral gene transfer (LGT) from distant species. Proximal connected arrows (as in *Mycoplasma moatsii*) indicate that ThrRSs originated from recent gene duplication or LGT from related species. The position of cyanobacterial T1, T2 is shown. T3 is a ThrRS acquired by horizontal gene transfer by cyanobacteria of the *Prochlorococcus* genus.

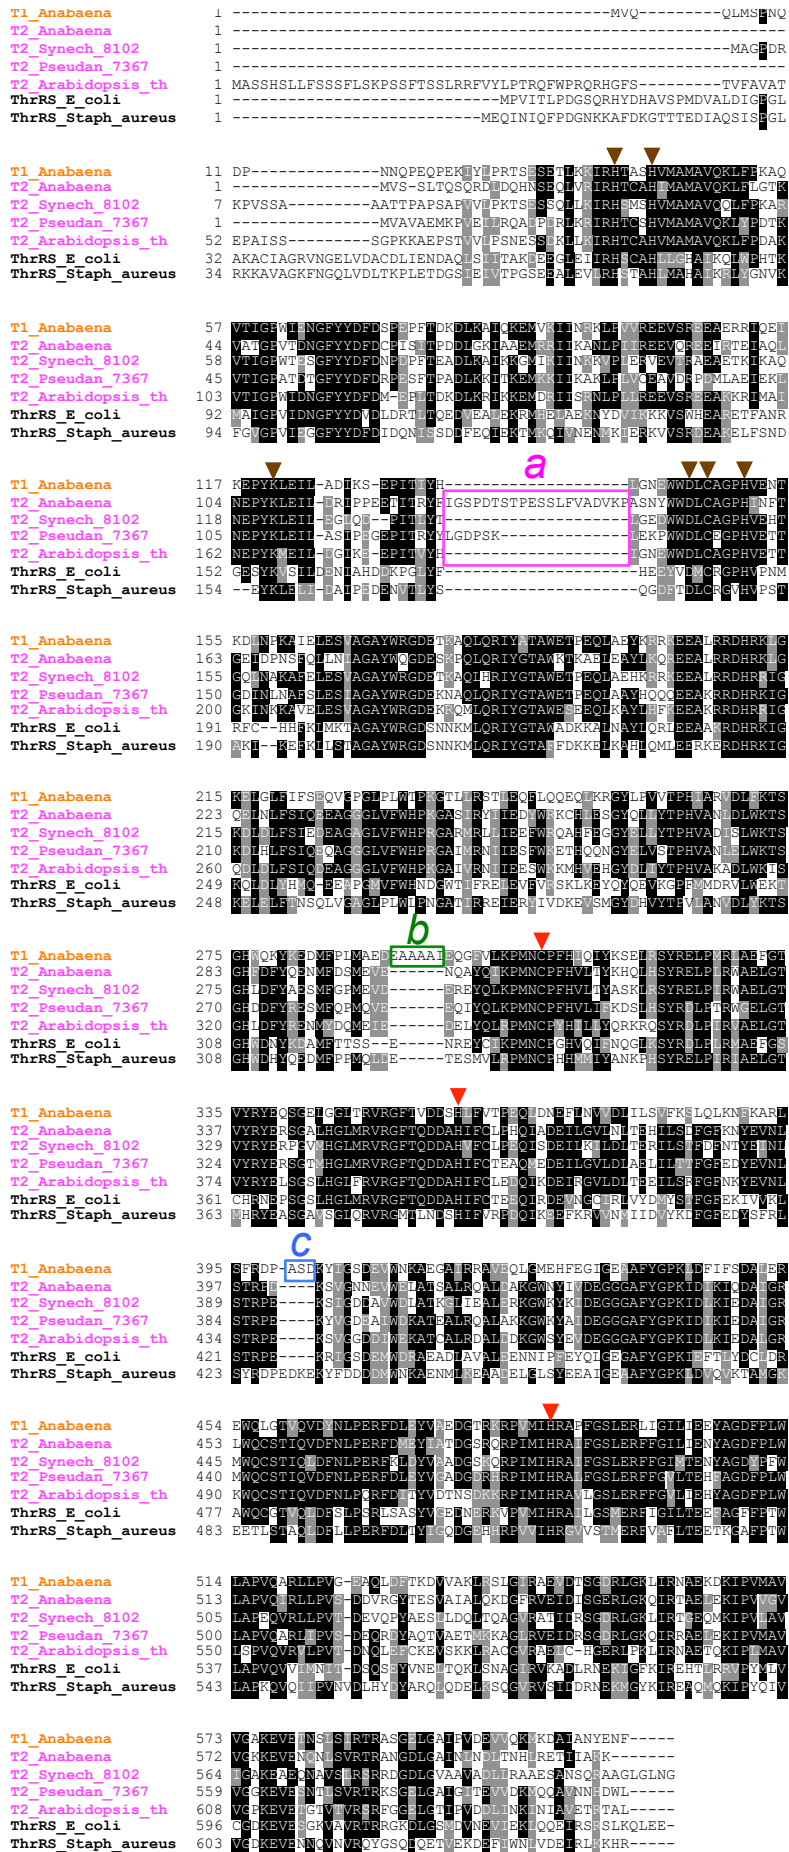

**Figure S2.** Alignment of ThrRS sequences. T1 sequences are labelled in orange color and T2 sequences in magenta. Insertions *a*, *b* and *c* are boxed. Red and brown arrowpoints indicate zinc coordination residues and amino acids involved in editing, respectively.

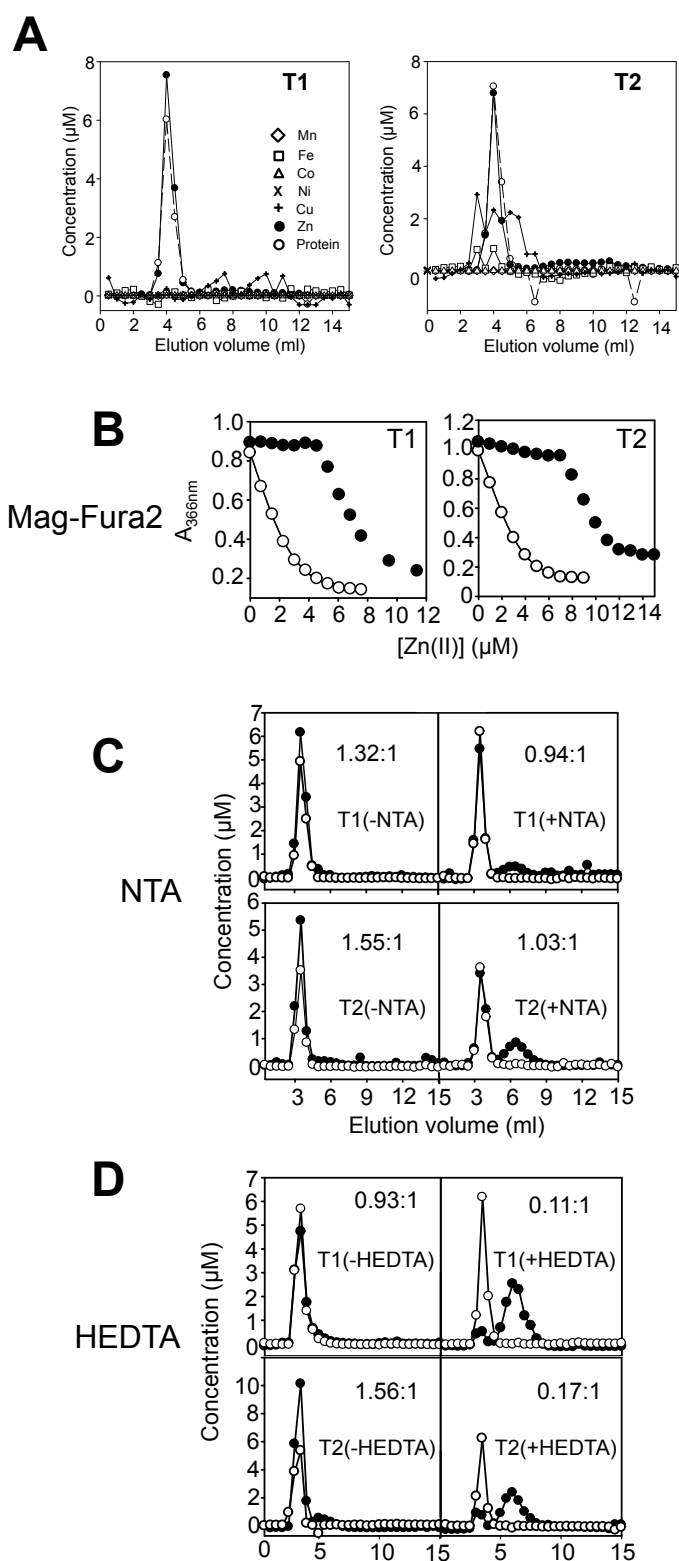

**Figure S3.** (A) Metal analysis of recombinant T1 and T2. Pure preparations of each proteins were subjected to gel filtration using buffer previously demetallated by two successive filtrations by Chelex-100 resin. Protein and metal content of fractions were determined by Bradford assays and ICP-MS. (B) Metal competition for Zn(II) during titration of 5 μM Mag-Fura-2 in the presence (closed symbols) or absence (open symbols) of 5 μM T1 (left) or T2 (right) recombinant proteins. (C and D) Competition of 10 μM of T1 (top panels) and T2 (bottom panels) for Zn(II) in the presence (right panels) or absence (left panels) of 20 μM NTA (C) or 20 μM HEDTA (D). Samples were processed by gel filtration as described in A. Numbers indicate the Zn(II):protein ratio of the peak fractions. Open and solid symbols indicate the protein and metal concentration, respectively.

### Comments on Fig. S3

These experiments indicate that both T1 and T2 possess a zinc affinity intermediate to NTA and HEDTA, as at pH 7.5 Mag-Fura-2 has a zinc binding affinity of  $2 \times 10^{-8}$  M (1), NTA of  $3.74 \times 10^{-9}$  M and HEDTA of  $5.96 \times 10^{-13}$  M. Intriguingly three separate experiments (Fig S3B right panel, Fig S3C lower-left panel and Fig S3D lower-left panel) suggest that the T2 isoform may have a higher zinc binding stoichiometry than the T1 isoform, three rather than two atoms per dimer. Interestingly, a stoichiometry above two atoms per dimer has also been observed for *E. coli* ThrRS incubated in the presence of 5 mM ZnCl<sub>2</sub> but not for a mutant lacking the N-terminal domain, suggesting that the extra metal binding site could be in this domain (2,3). This was further supported by the inhibitory action of zinc or nickel ions on the oxidation of the cysteine residue in the editing site (4). Also consistent with this is the observation of X-ray scattering in the crystal of ThrRS of *Staphylococcus aureus* proposed to result from a metal ion bound to the editing site (5). The physiological relevance of this elevated zinc binding stoichiometry of T2 remains to be elucidated.

1. Simons, T.J. (1993) Measurement of free Zn<sup>2+</sup> ion concentration with the fluorescent probe mag-fura-2 (furaptra). *J Biochem Biophys Methods*, 27, 25-37.
2. Dock-Bregeon, A., Sankaranarayanan, R., Romby, P., Caillet, J., Springer, M., Rees, B., Francklyn, C.S., Ehresmann, C. and Moras, D. (2000) Transfer RNA-mediated editing in threonyl-tRNA synthetase. The class II solution to the double discrimination problem. *Cell*, 103, 877-884.
3. Dock-Bregeon, A.C., Rees, B., Torres-Larios, A., Bey, G., Caillet, J. and Moras, D. (2004) Achieving error-free translation; the mechanism of proofreading of threonyl-tRNA synthetase at atomic resolution. *Mol Cell*, 16, 375-386.
4. Wu, J., Fan, Y. and Ling, J. (2014) Mechanism of oxidant-induced mistranslation by threonyl-tRNA synthetase. *Nucleic Acids Res*, 42, 6523-6531.
5. Torres-Larios, A., Sankaranarayanan, R., Rees, B., Dock-Bregeon, A.C. and Moras, D. (2003) Conformational movements and cooperativity upon amino acid, ATP and tRNA binding in threonyl-tRNA synthetase. *J Mol Biol*, 331, 201-211.

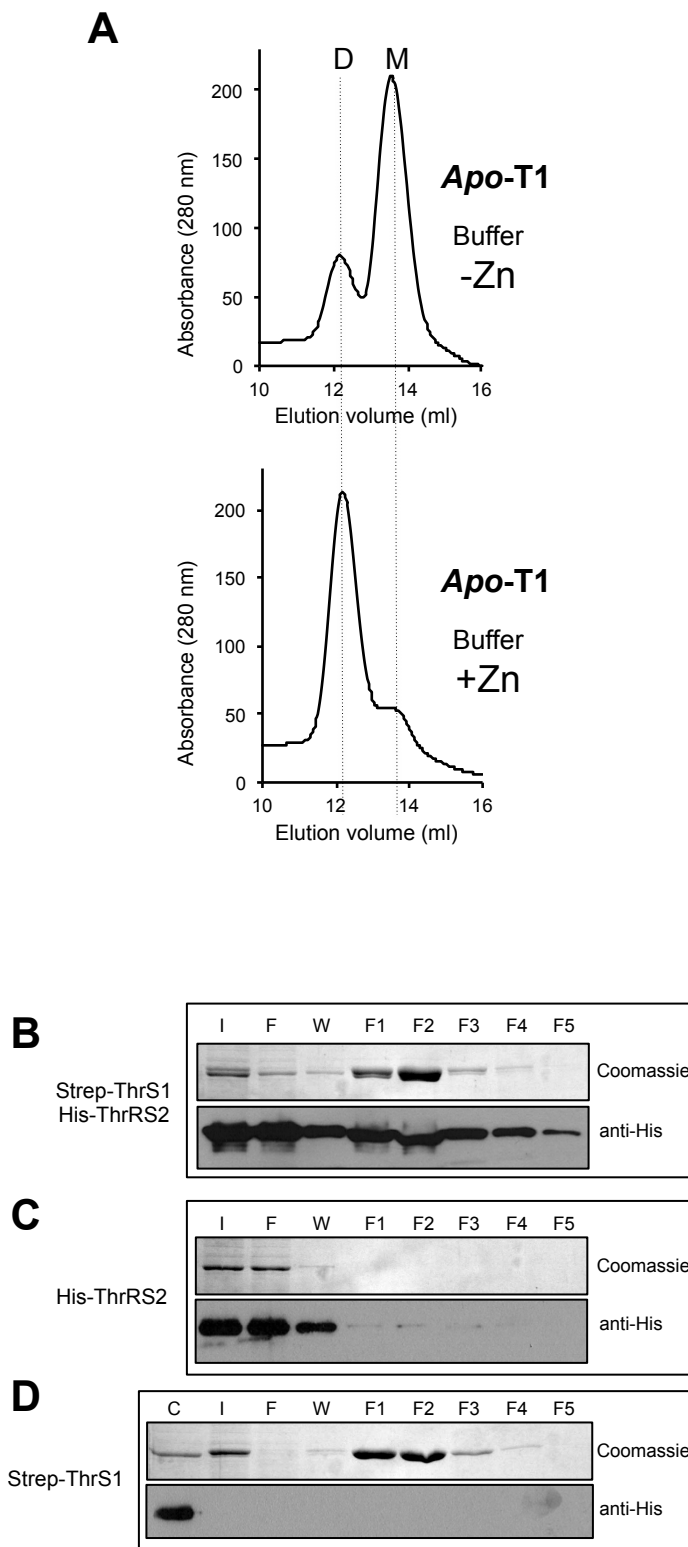

**Fig. S4.** Homodimerization and heterodimerization by T1. (A) Dissociation of T1 is a reversible process. Pure preparations of T1 protein were incubated for 24 h in the presence of 5 mM EDTA and subjected to gel filtration in buffer containing 150 mM NaCl, 100 mM Tris-HCl pH 7.5, 1 mM DTT, supplemented with 5 mM EDTA (top panel) or 5 mM ZnSO<sub>4</sub> (bottom panel). “D” and “M” indicate the elution volume corresponding to the size of a dimer (150 KDa) or a monomer (75 KDa), respectively. (B, C and D) Extracts from *E. coli* expressing the proteins indicated at the left were subjected to streptavidine affinity chromatography, and fractions were resolved by SDS-PAGE and stained with coomassie or transferred to membranes and incubated with anti-hexahistidine antibodies, as indicated at the right. Letters “I, F, W and F1-F5” indicated respectively input, flow through, wash, and elution fractions 1 to 5. Letter “C” on top of the bottom panel indicate a positive control for the western.

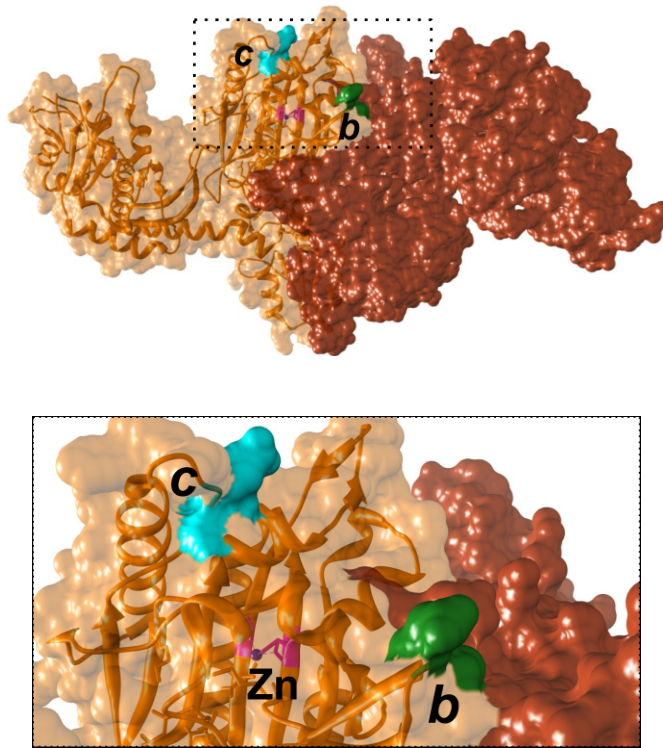

**Fig. S5.** Localization of insertions *b* and *c* in the three dimensional structure of T1. The structure of the *Staphylococcus aureus* ThrRS (PBD id: 1NYR) was used to highlight residues E<sub>325</sub> and T<sub>326</sub> flanking the insertion point of insert *b* in *Anabaena* T1 (in green) and residues D<sub>429</sub>, K<sub>430</sub> and E<sub>431</sub> that align with residues of insert *c* in *Anabaena* T1. Subunits are depicted in different orange tones. Zn is shown in dark blue and Zn-binding residues in magenta.
